# Supplementary material
Source: publisher figshare collection journal article supplement (https://tandf.figshare.com/ndownloader/files/14413595)
Supplement: Supplementary file 1 [file 14413595]

Formation of Diaryl Sulfides and Sulfoxides: Synthesis, Characterization and Structure Activity Correlation Studies

Devappa S. Lamani*a, S. G. Badigera, Mamata Singhb

a Department of Chemistry, Basaveshawar Science College, Bagalkot, Rani Channamma University, Karnataka, India

bDepartment of Chemistry, GITAM Bangalore (Deemed to be University), Karnataka, India

Email: [kattimani.devaraj67@gmail.com](mailto:kattimani.devaraj67@gmail.com)

**Supplemental Materials**


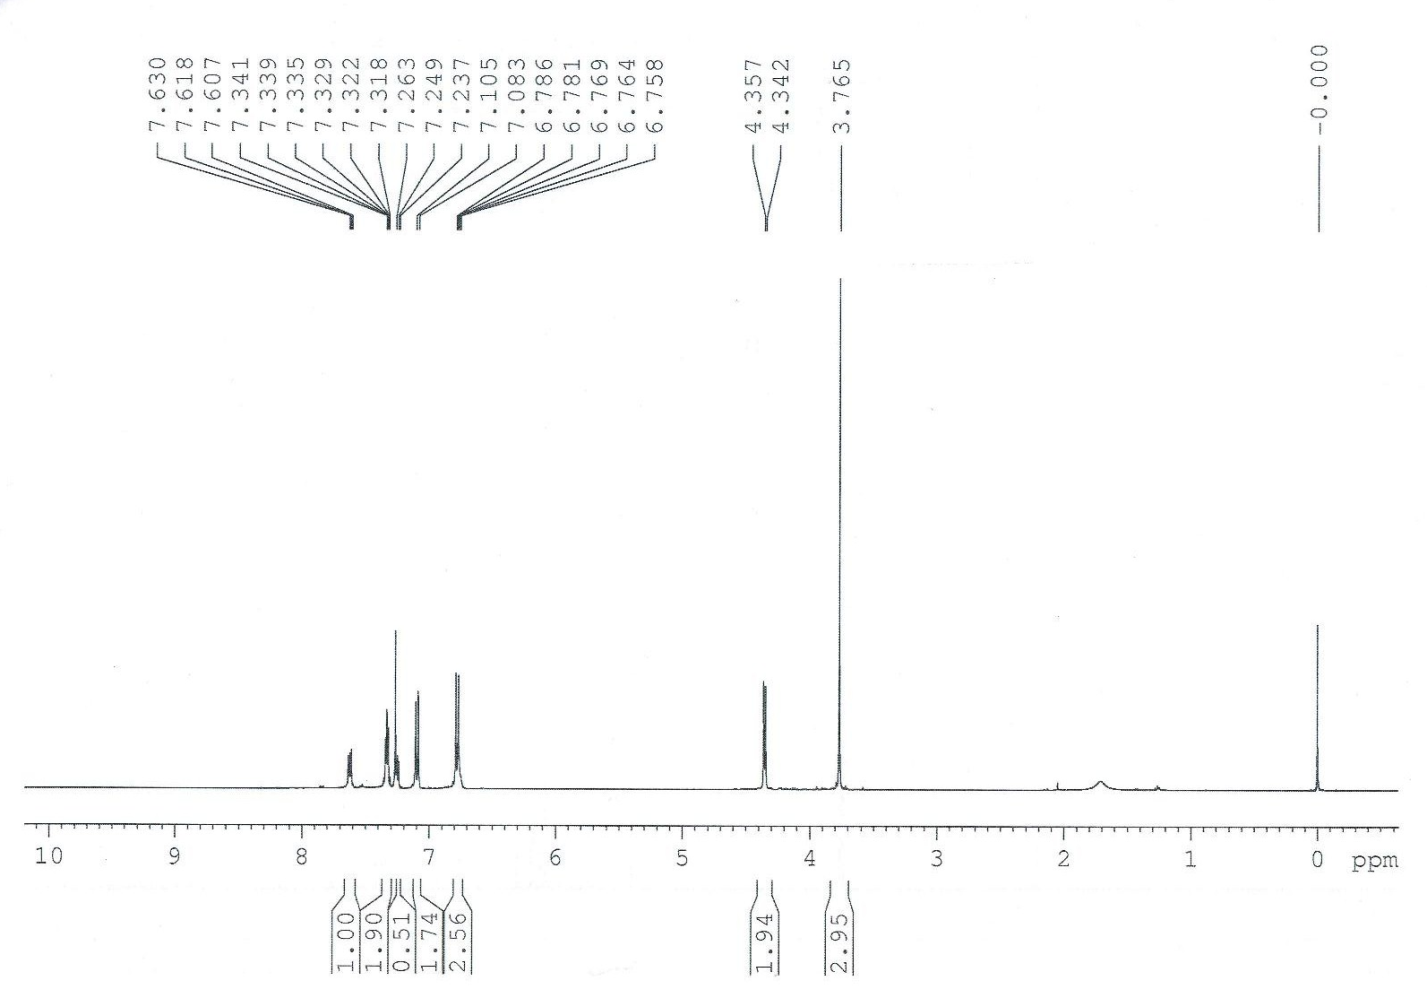


Figure S 1. 1H-NMR spectra of pure sulfurane oxide **21** in CDCl3


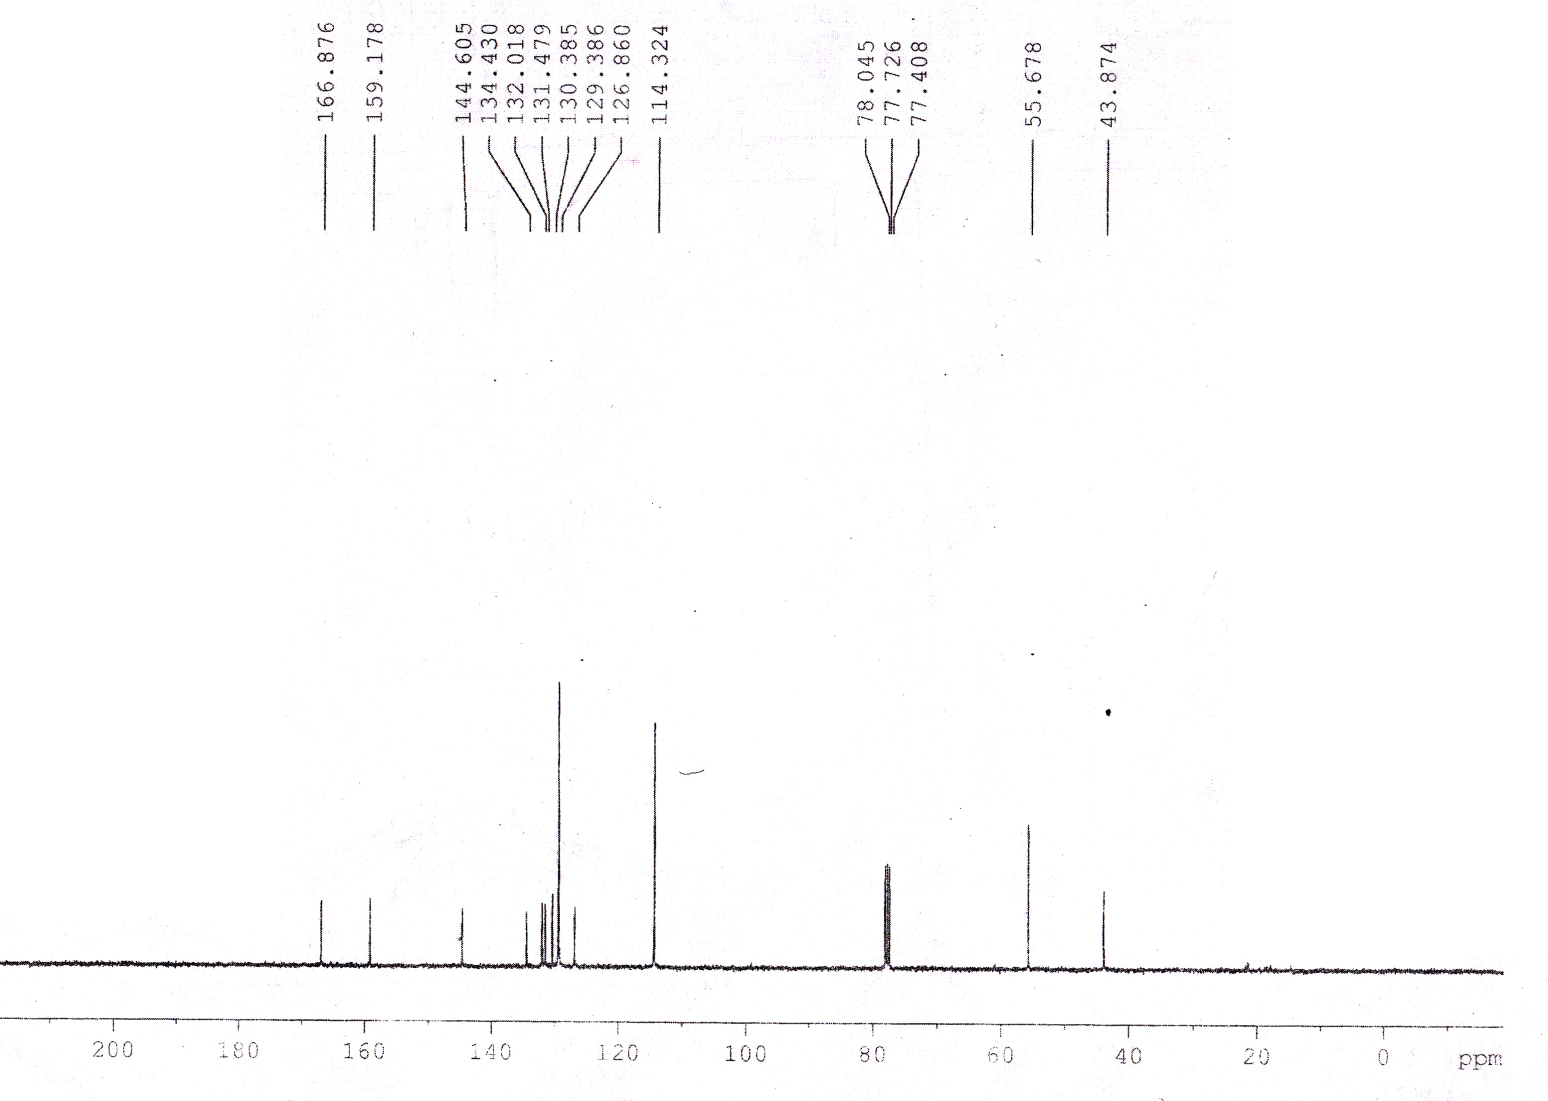


Figure S 2. 13C-NMR spectra of pure sulfurane oxides **21** in CDCl3


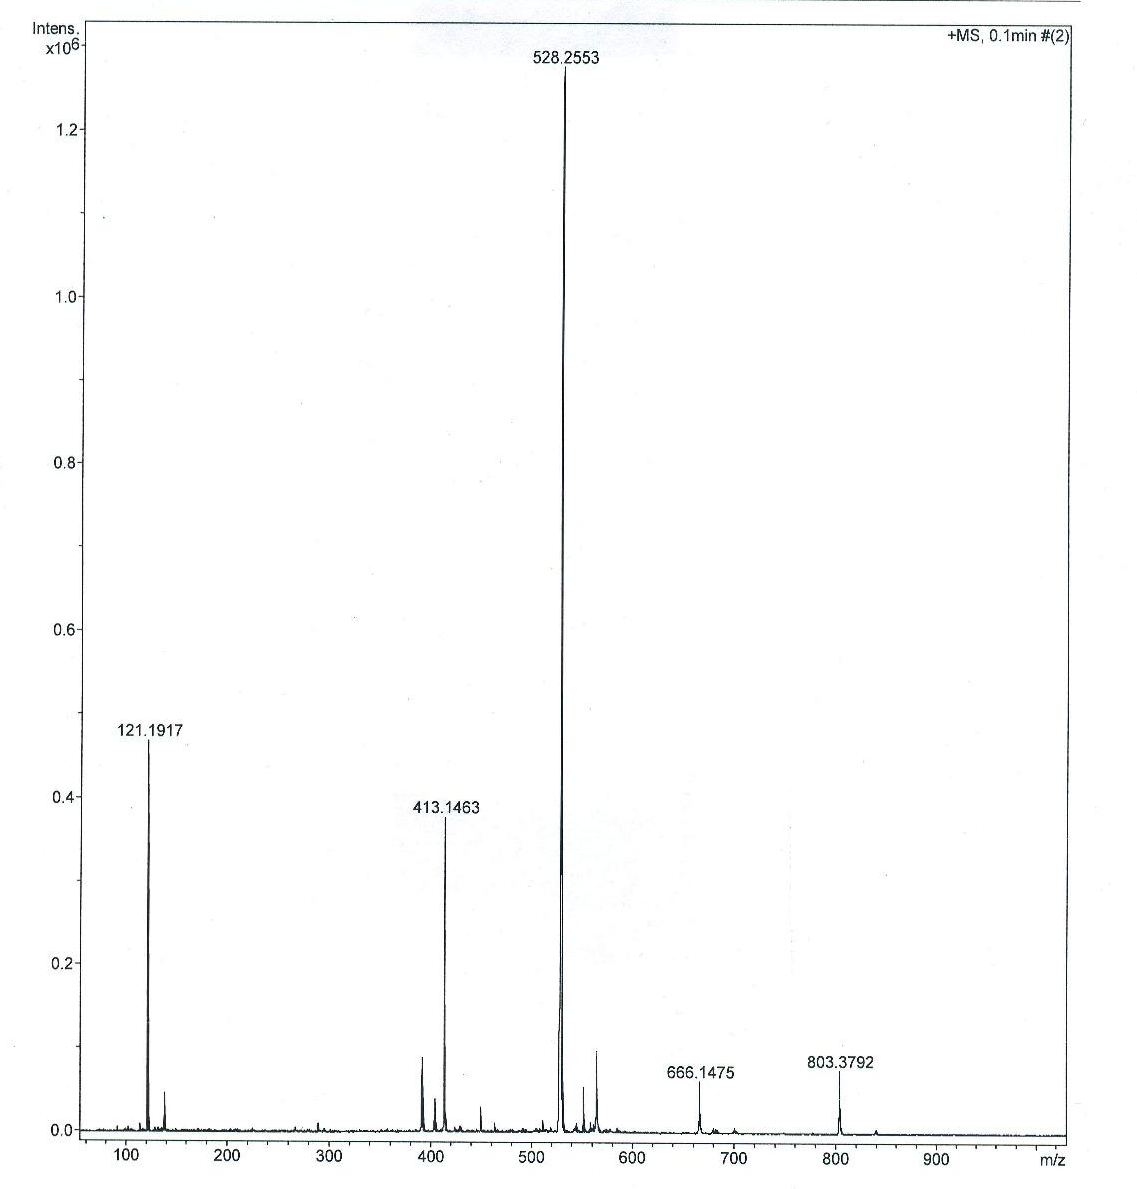


Figure S 3.ESI-Mass spectrum of compound **21**. ESI-MS (*m*/*z*) Calcd, C30H28N2O5S: 528.0,

found: 528.2 [M +].


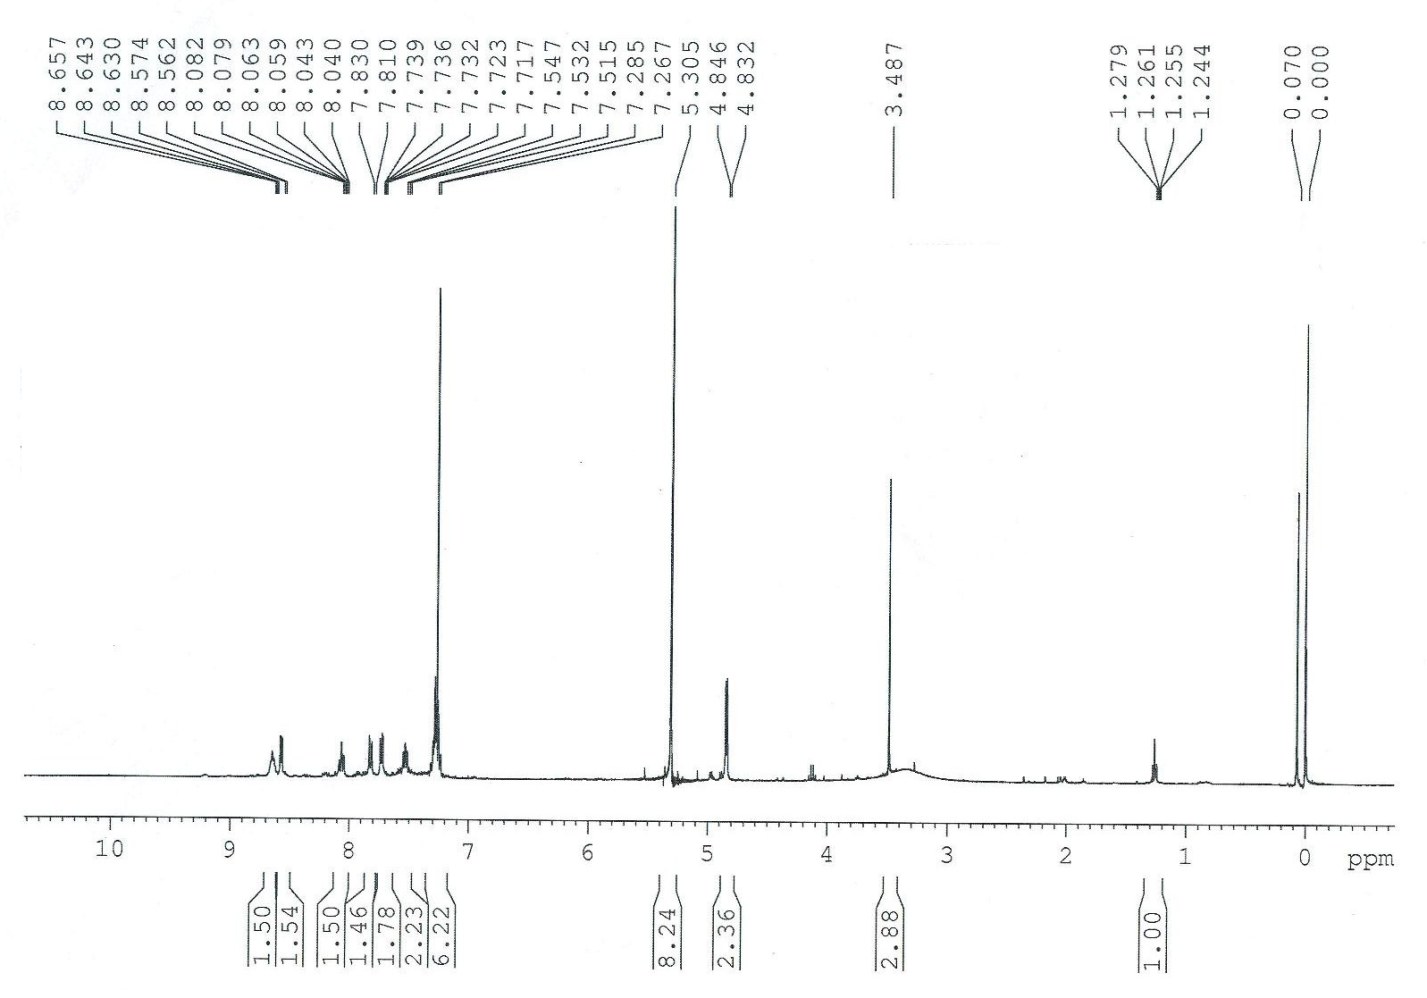


Figure S 4.1H-NMR spectra of pure sulfurane oxide **22** in CDCl3


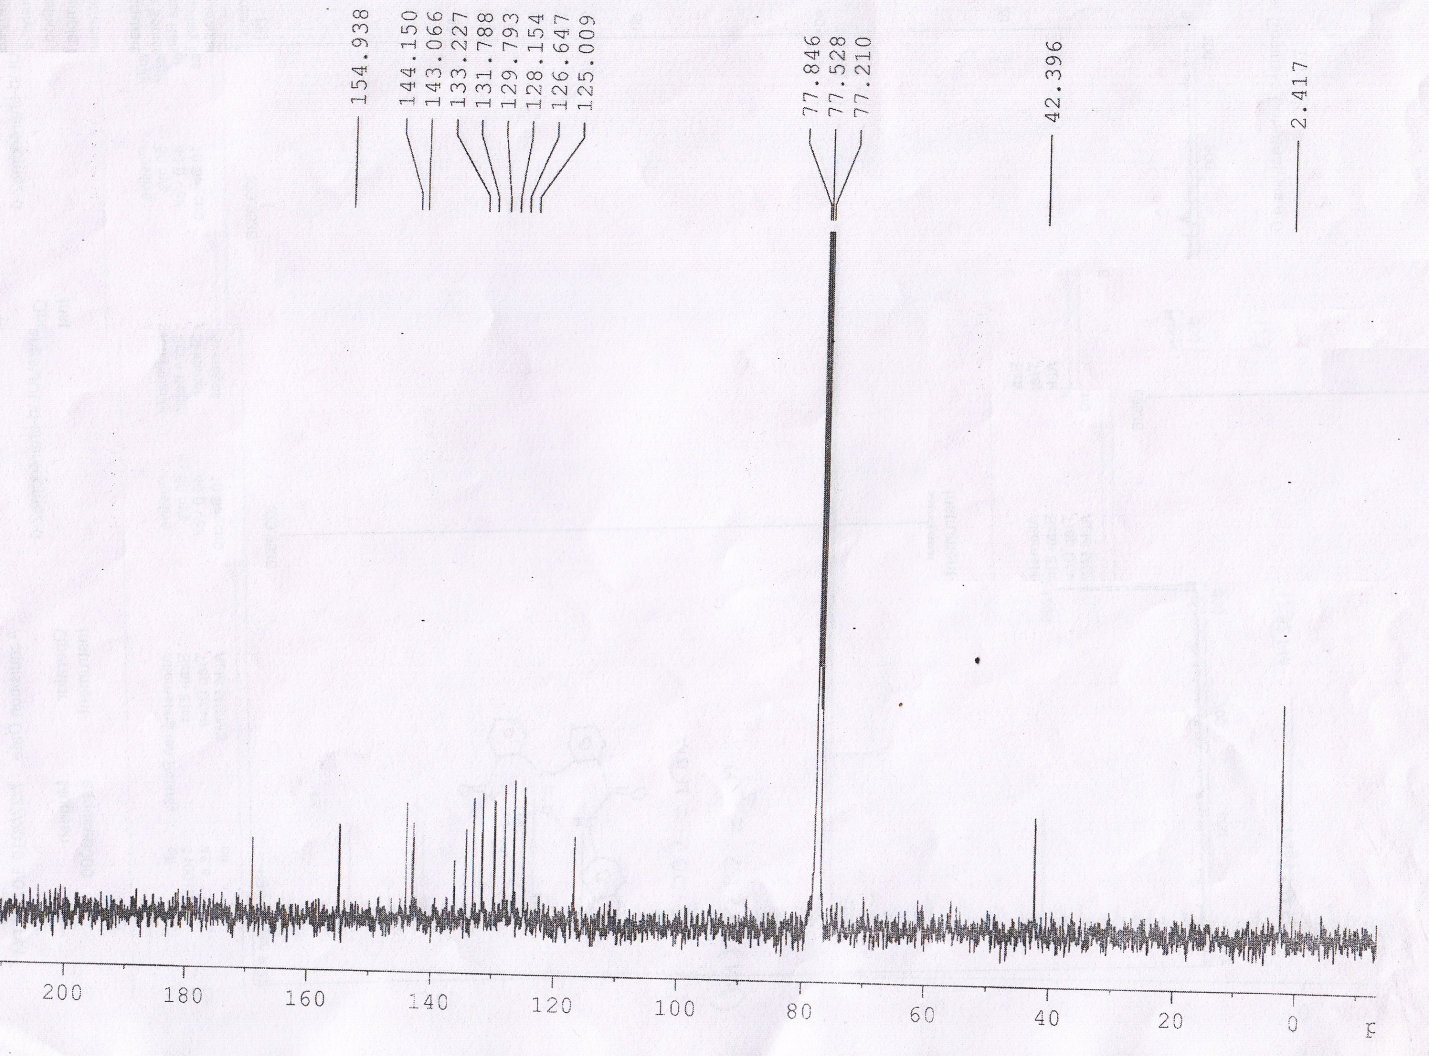


Figure S 5. 13C-NMR spectra of pure sulfurane oxides **22** in CDCl3


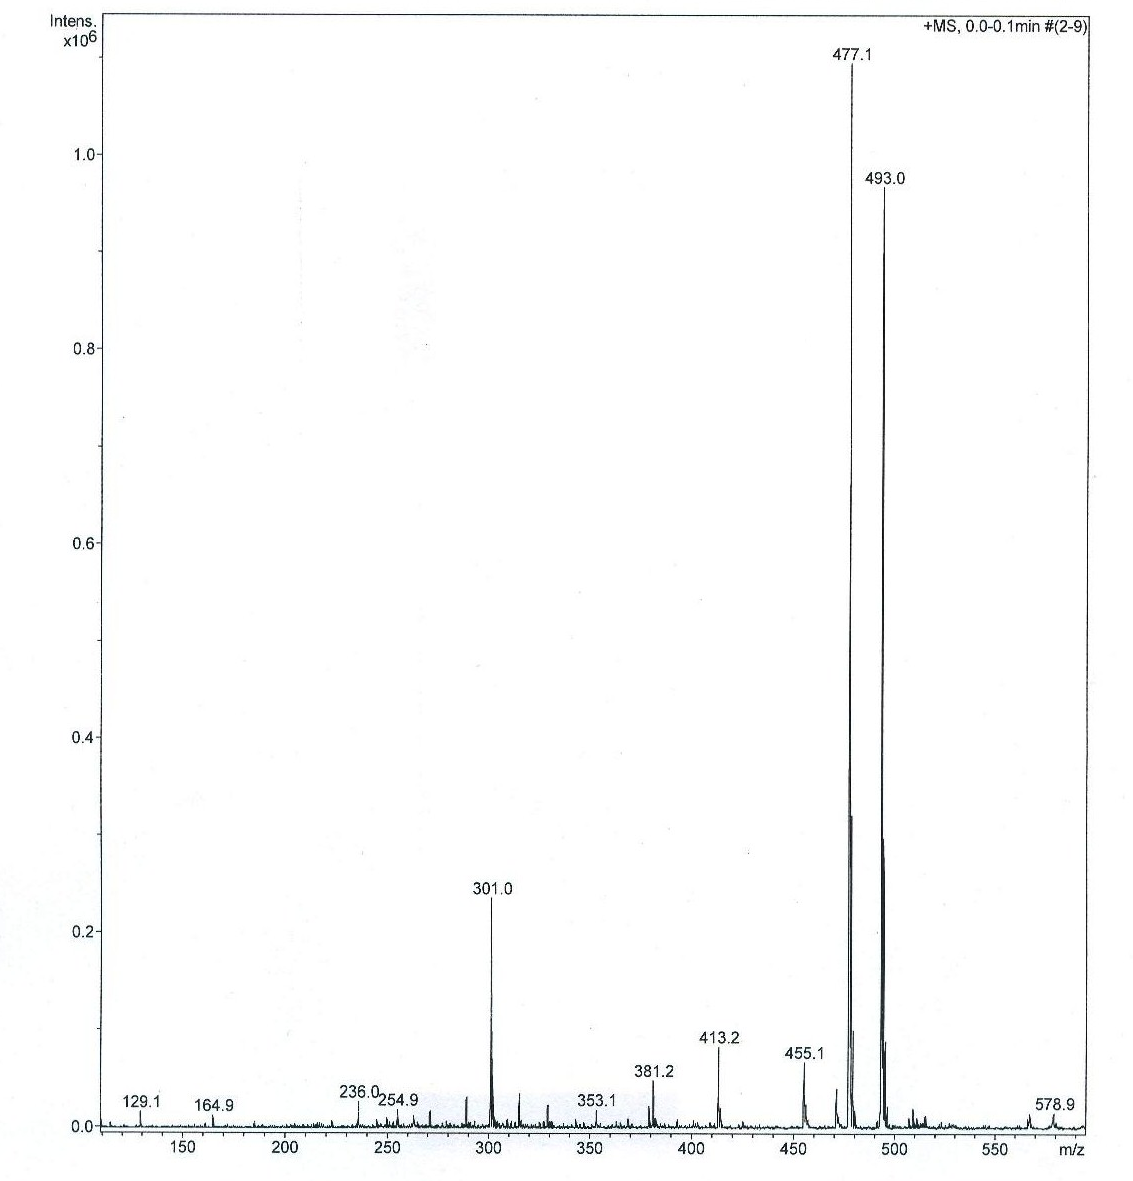


Figure S 6.ESI-Mass spectrum of compound **22**. ESI-MS (*m*/*z*) Calcd, C26H22N4O3S: 474.5,

found: 493.0 [M+ Na+].


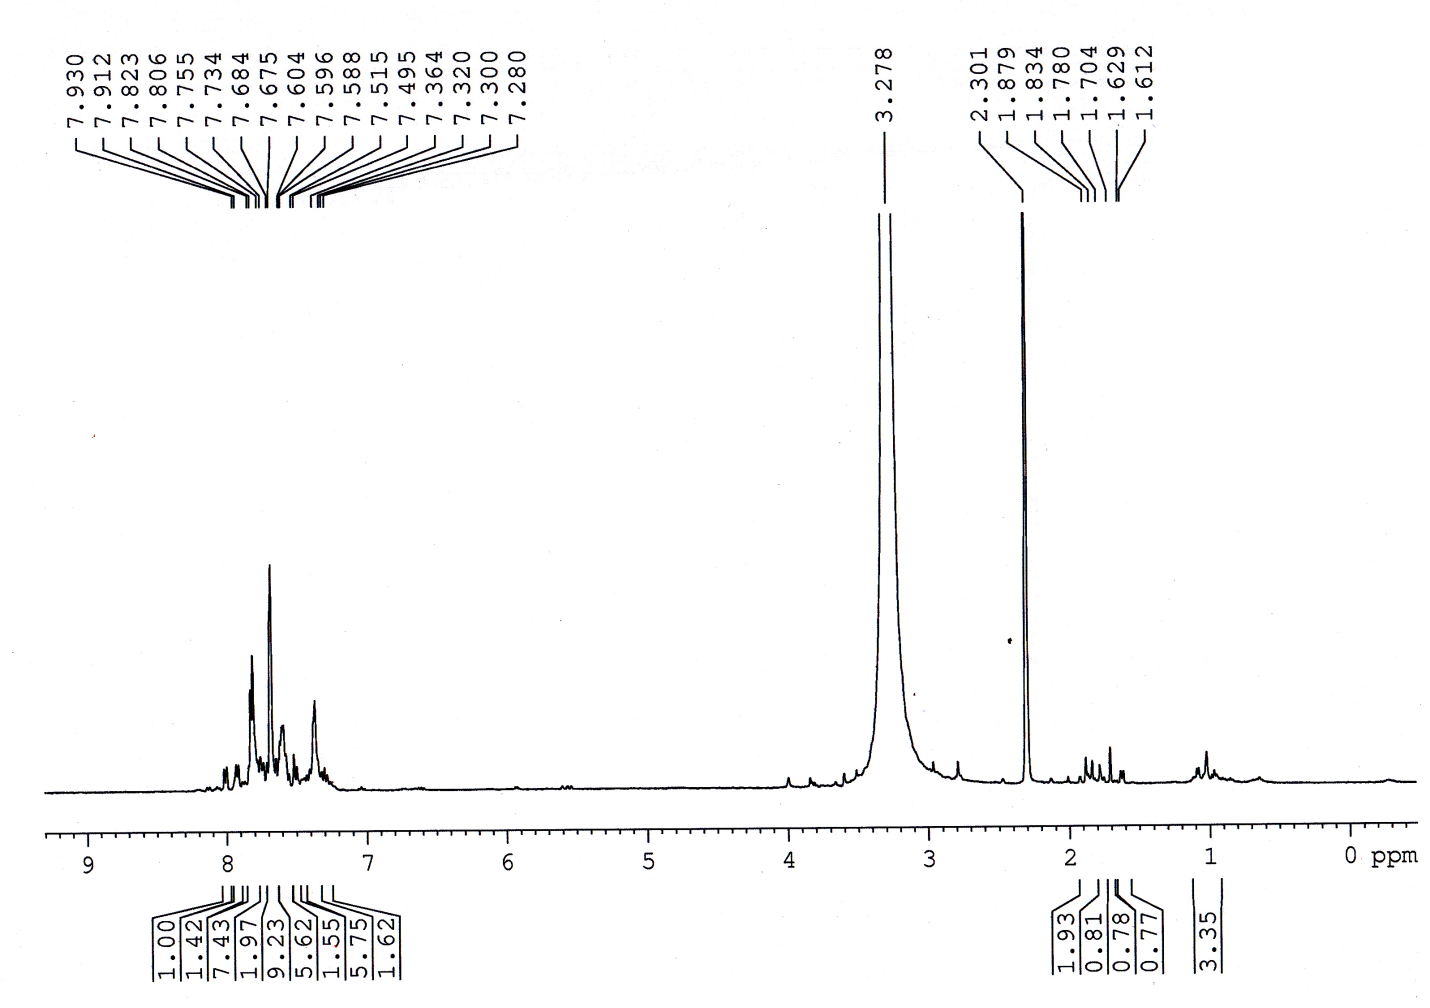


Figure S 7.1H-NMR spectra of pure Sulfurane oxide **25** in DMSO-d6


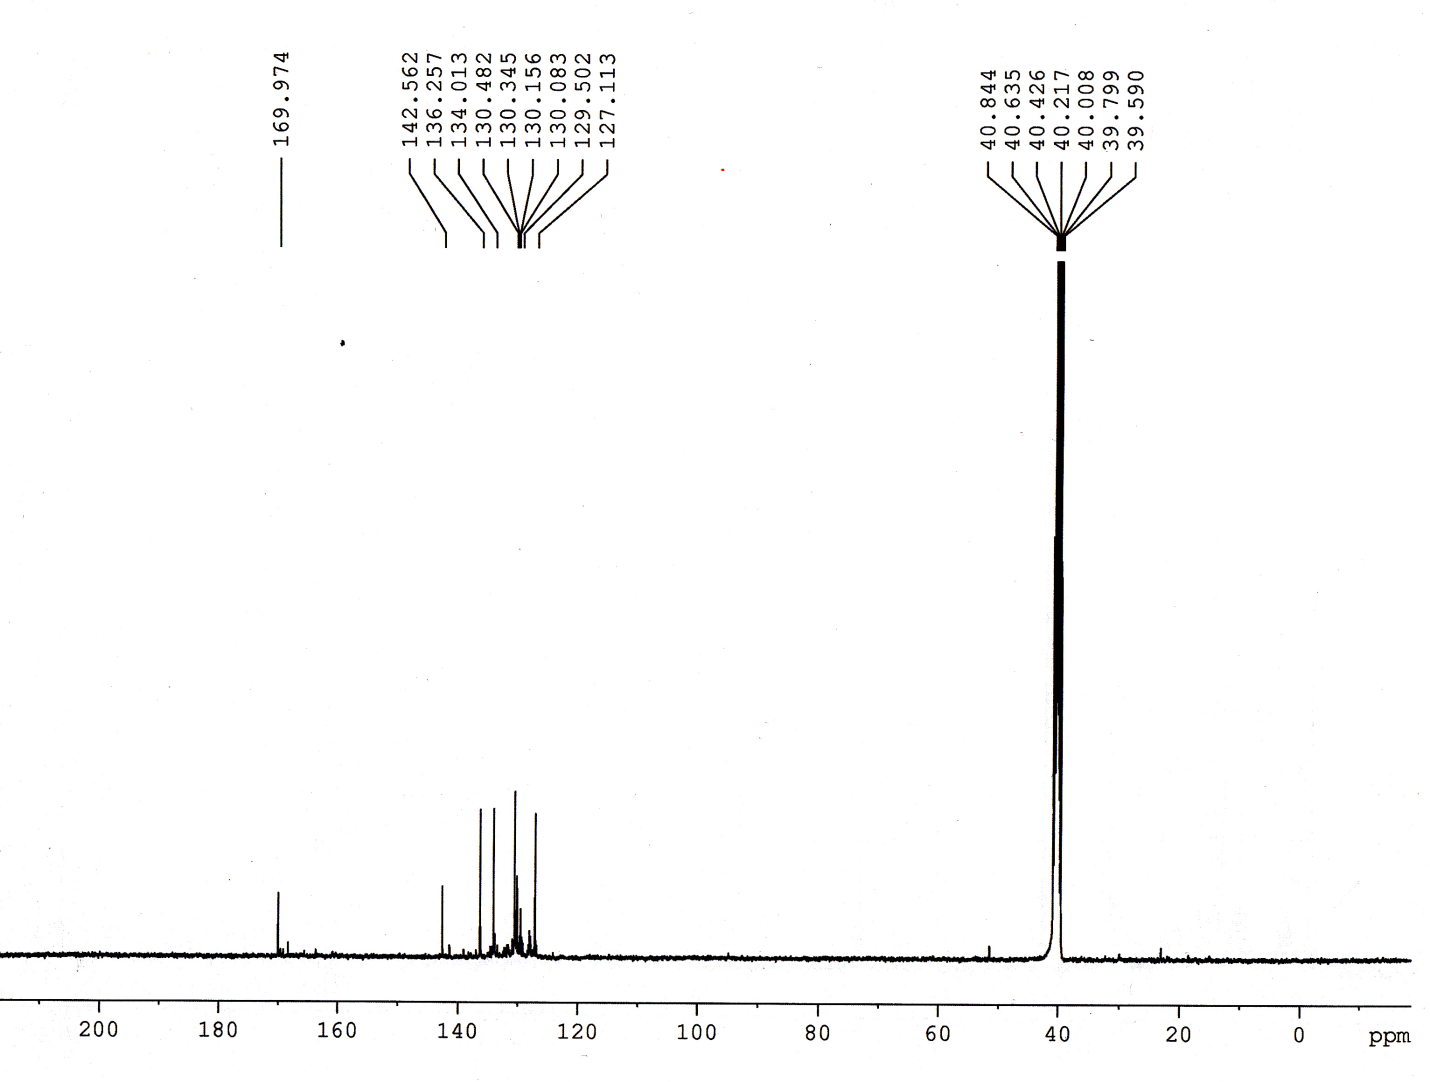


Figure S 8. **13**C-NMR spectra of pure sulfurane oxides **25** in DMSO-d6


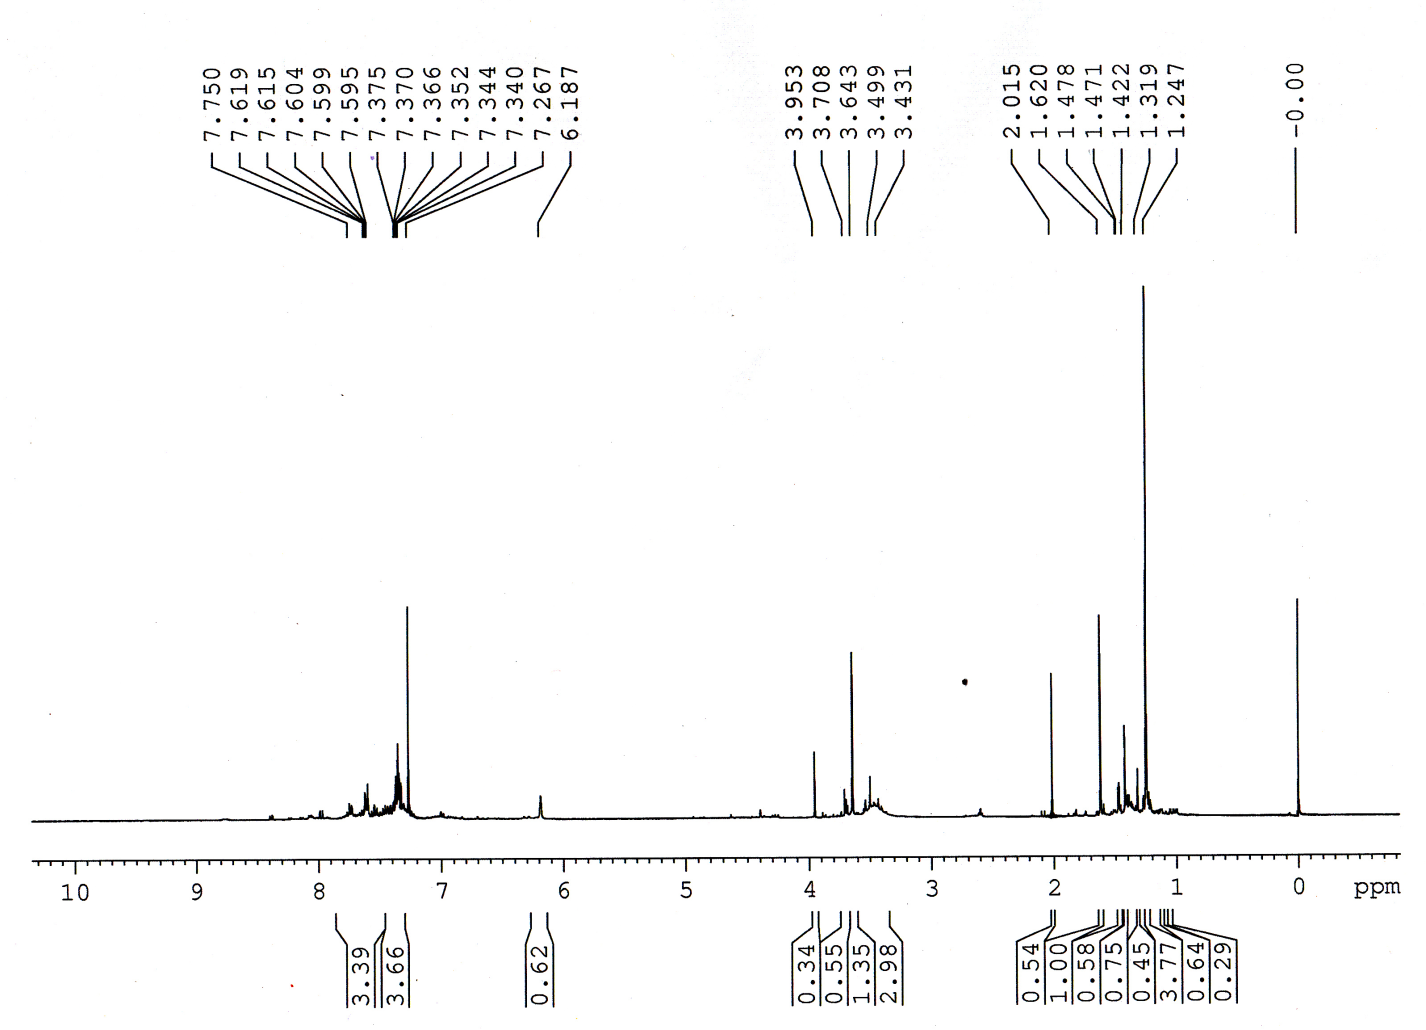


Figure S 9.1H-NMR spectra of pure Sulfurane oxide **26** in CDCl3


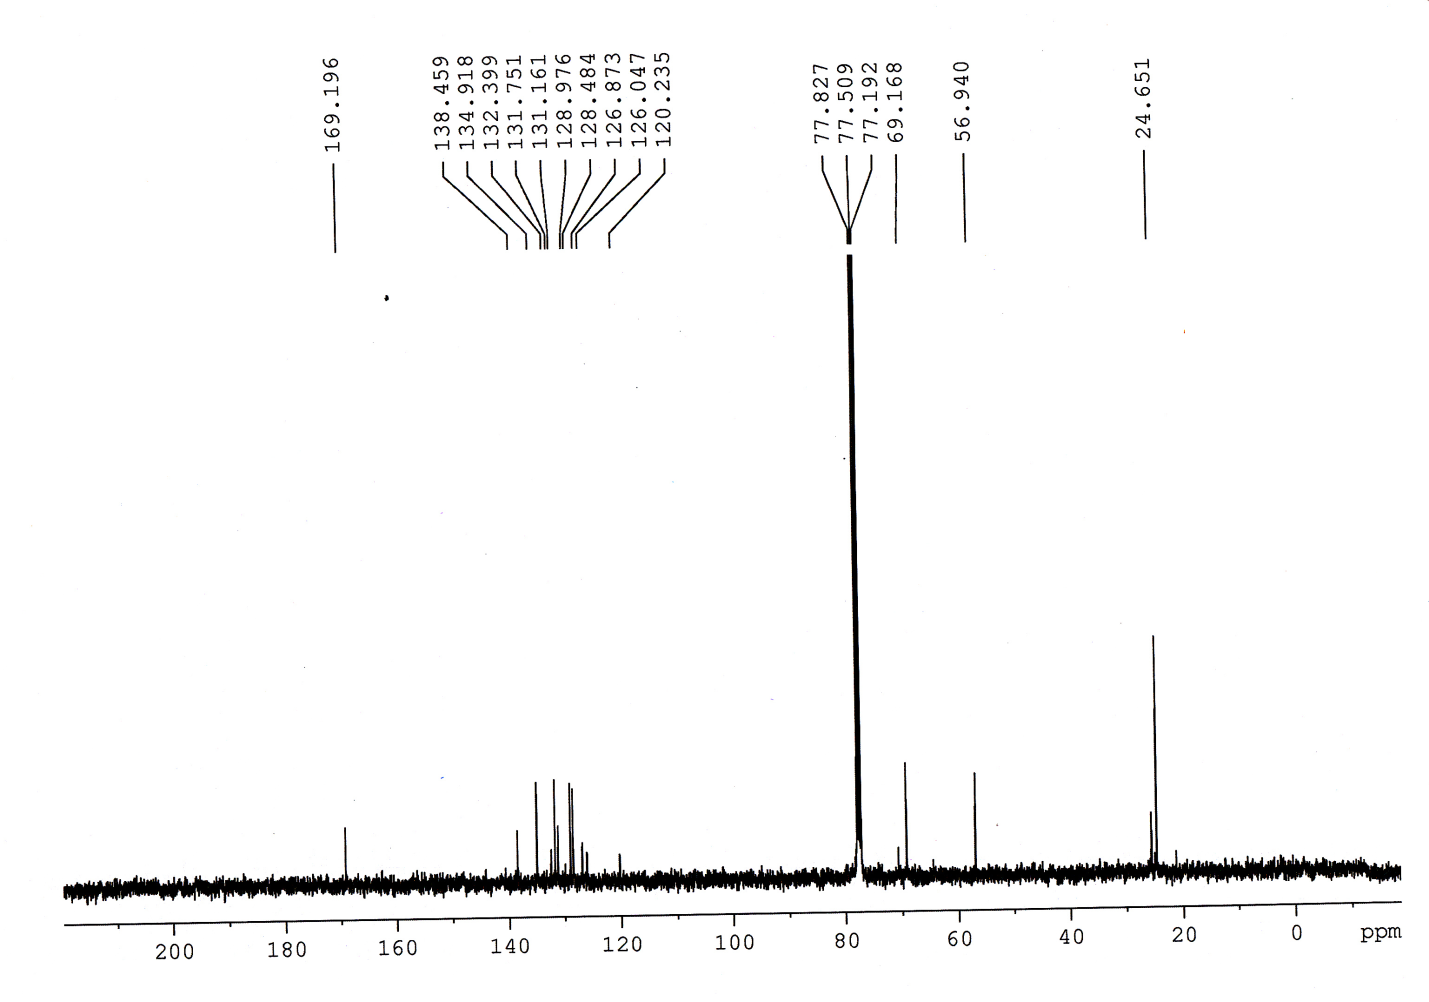


Figure S 10. 13C-NMR spectra of pure sulfurane oxides **26** in CDCl3
